# Supplementary material
Source: PubMed Central journal article supplement (PMC7017411)
Supplement: ao0c00021_si_001.pdf [file ao0c00021_si_001.pdf]

## *Supplementary information*

# Using smartphone APP to determine $\text{CN}^-$ concentration quantitatively in tap water: synthesis of the naked-eye colorimetric chemosensor for $\text{CN}^-$ and $\text{Ni}^{2+}$ based on benzothiazole

Cui-Bing Bai,<sup>†,‡</sup> Xin-Yu Liu,<sup>†</sup> Jie Zhang,<sup>†</sup> Rui Qiao,<sup>\*,†,‡</sup> Kun Dang,<sup>†</sup> Chang Wang,<sup>†,‡</sup> Biao Wei,<sup>†,‡</sup> Lin Zhang,<sup>†,‡</sup> Shui-Sheng Chen<sup>†,‡</sup>

<sup>†</sup> School of Chemistry and Materials Engineering, Fuyang Normal University, Fuyang, Anhui Province, 236037, China.

<sup>‡</sup> Engineering Research Center of Biomass Conversion and Pollution Prevention of Anhui Educational Institutions, Fuyang Normal University, Fuyang, Anhui Province, 236037, China

\* Corresponding Author E-mail: qiaorui@mail.ipc.ac.cn

## Contents

|                                                                                                                |    |
|----------------------------------------------------------------------------------------------------------------|----|
| <b>Figure S1</b> $^1\text{H}$ NMR spectrum of <b>DK</b> in $\text{DMSO-}d_6$ .....                             | S2 |
| <b>Figure S2</b> $^{13}\text{C}$ NMR spectrum of <b>DK</b> in $\text{DMSO-}d_6$ .....                          | S2 |
| <b>Figure S3</b> ESI-MS data of <b>DK</b> .....                                                                | S3 |
| <b>Figure S4-S5</b> Interference experiment.....                                                               | S3 |
| <b>Figure S6</b> A Job's plot for the <b>DK</b> and $\text{CN}^-$ based on continuous variation method.....    | S5 |
| <b>Figure S7</b> A Job's plot for the <b>DK</b> and $\text{Ni}^{2+}$ based on continuous variation method..... | S5 |
| <b>Figure S8</b> Job's Plot showing the 1:1 stoichiometry between <b>DK</b> and $\text{CN}^-$ .....            | S6 |
| <b>Figure S9</b> Job's Plot showing the 2:1 stoichiometry between <b>DK</b> and $\text{Ni}^{2+}$ .....         | S7 |
| <b>Figure S10</b> ESI-MS data of $[\text{DK-CN} + \text{H}^+]^+$ .....                                         | S8 |
| <b>Figure S11</b> ESI-MS data of $[\text{DK} + 2\text{Ni}^{2+} + 2\text{NO}_3^- + \text{H}^+]^+$ .....         | S8 |

|                                                                                                |     |
|------------------------------------------------------------------------------------------------|-----|
| <b>Figure S12</b> $^1\text{H}$ NMR titration spectra.....                                      | S9  |
| <b>FigureS13</b> FT-IR spectra of <b>DK</b> and <b>DK</b> + $\text{CN}^-$ in KBr disks.....    | S10 |
| <b>FigureS14</b> FT-IR spectra of <b>DK</b> and <b>DK</b> + $\text{Ni}^{2+}$ in KBr disks..... | S10 |
| <b>Figure S15-S16</b> The calculation of the detection limits (LOD).....                       | S11 |
| <b>Table S1</b> Comparison with the reported chemosensors with <b>DK</b> .....                 | S13 |
| <b>Figure S17</b> Testing tap water with test paper.....                                       | S14 |
| <b>References</b> .....                                                                        | S14 |

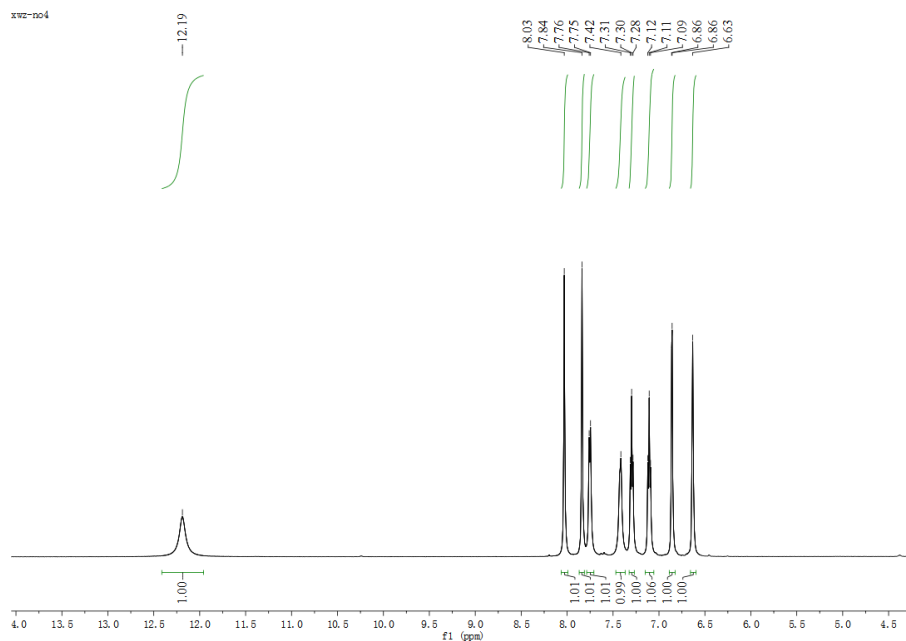

**Figure S1**  $^1\text{H}$  NMR spectrum of **DK** in  $\text{DMSO-}d_6$ .

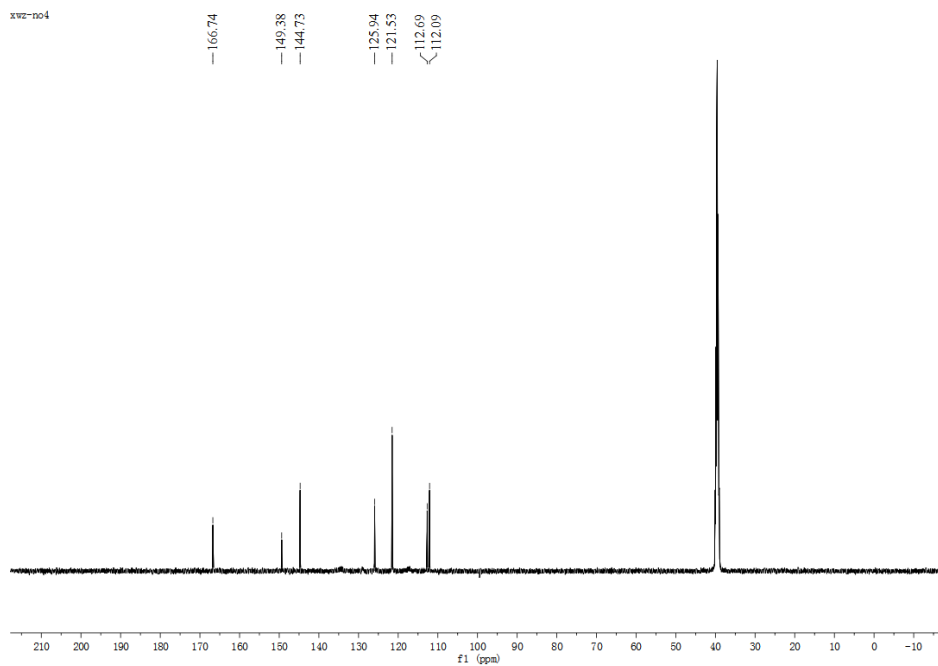

**Figure S2**  $^{13}\text{C}$  NMR spectrum of **DK** in  $\text{DMSO-}d_6$ .

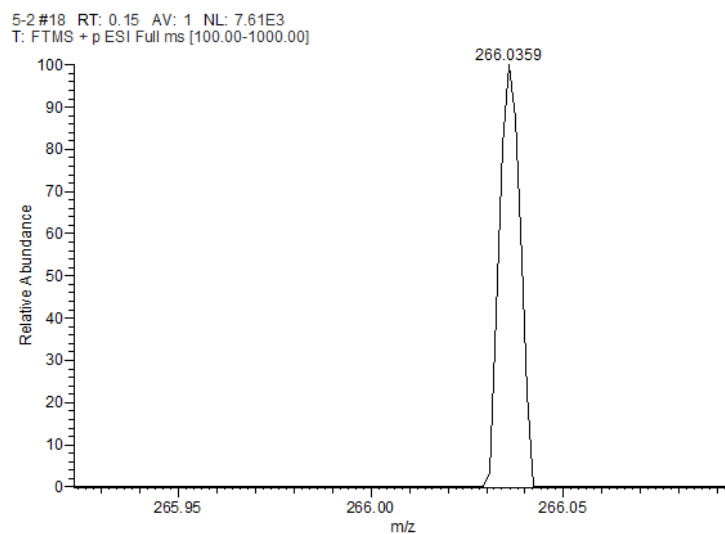

**Figure S3** ESI-MS spectrum of **DK**.

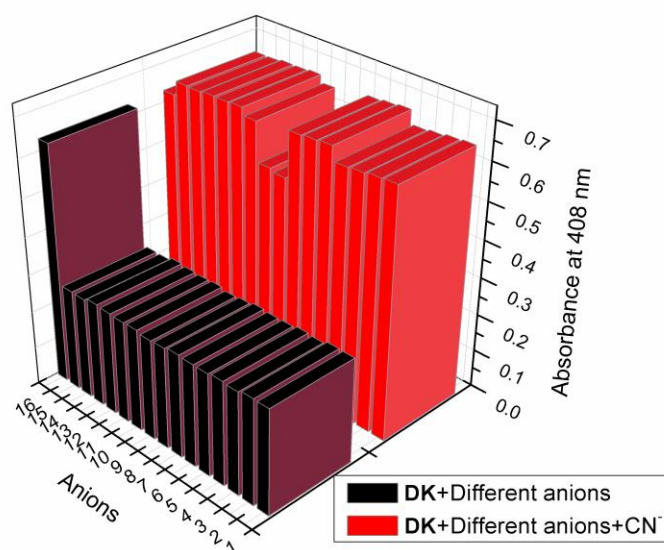

**Figure S4** Black bar: Absorption spectra of **DK** with different anions in HEPES buffer /CH<sub>3</sub>CN (0.01 M, pH=7.3, V/V = 10:90) solution. Red bar: Absorption spectra of **DK** with the mixture of CN<sup>-</sup> and other anions in HEPES buffer /CH<sub>3</sub>CN (0.01 M, pH=7.3, V/V = 10:90) solution. 1-16: F<sup>-</sup>, Cl<sup>-</sup>, Br<sup>-</sup>, I<sup>-</sup>, SO<sub>4</sub><sup>2-</sup>, SO<sub>3</sub><sup>2-</sup>, S<sup>2-</sup>, NO<sub>3</sub><sup>-</sup>, NO<sub>2</sub><sup>-</sup>, PO<sub>4</sub><sup>3-</sup>, CO<sub>3</sub><sup>2-</sup>, HCO<sub>3</sub><sup>-</sup>, AcO<sup>-</sup>, EDTA, H<sub>2</sub>PO<sub>4</sub><sup>-</sup>, CN<sup>-</sup>.

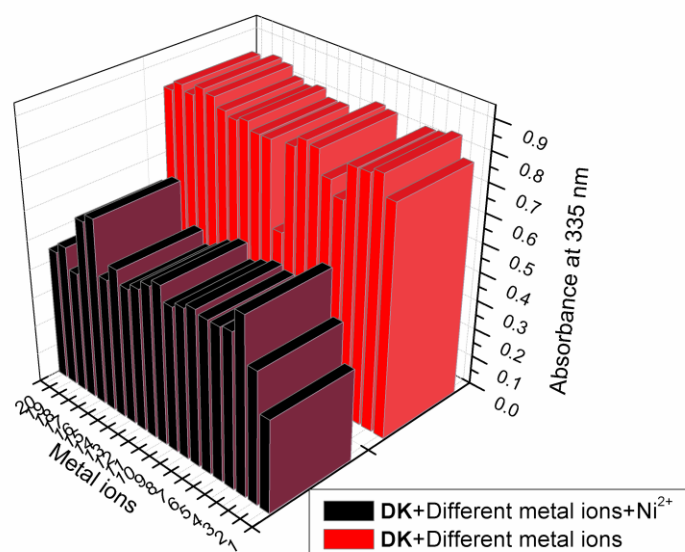

**Figure S5** Black bar: Absorption spectra of **DK** with the mixture of Ni<sup>2+</sup> and other metal ions in HEPES buffer /CH<sub>3</sub>CN (0.01 M, pH=7.3, V/V = 10:90) solution. Red bar: Absorption spectra of **DK** with different metal ions in HEPES buffer /CH<sub>3</sub>CN (0.01 M, pH=7.3, V/V = 10:90) solution. 1-20: Fe<sup>2+</sup>, Fe<sup>3+</sup>, Hg<sup>2+</sup>, Na<sup>+</sup>, Cu<sup>2+</sup>, Co<sup>2+</sup>, Mg<sup>2+</sup>, Ce<sup>3+</sup>, Cd<sup>2+</sup>, Ni<sup>2+</sup>, Zn<sup>2+</sup>, Ag<sup>+</sup>, K<sup>+</sup>, Ba<sup>2+</sup>, Pb<sup>2+</sup>, Y<sup>3+</sup>, Al<sup>3+</sup>, Sr<sup>2+</sup>, Mn<sup>2+</sup>, Ca<sup>2+</sup>.

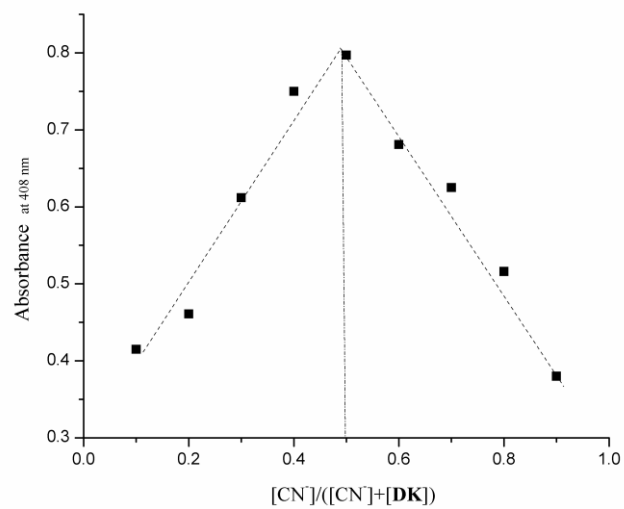

**Figure S6** A Job's plot for the **DK** and  $CN^-$  based on continuous variation method.

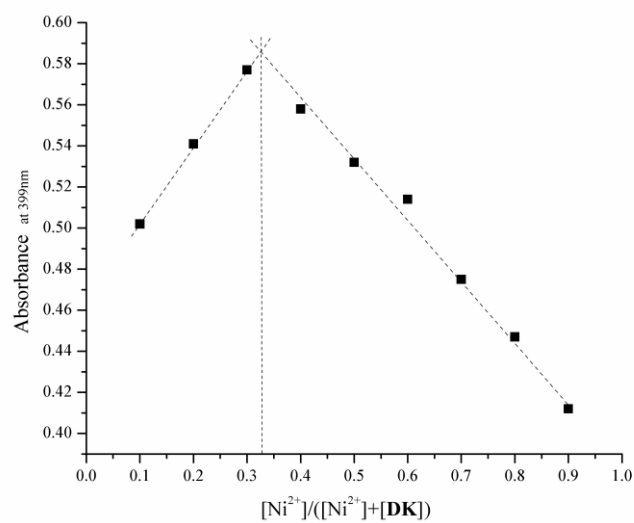

**Figure S7** A Job's plot for the **DK** and  $Ni^{2+}$  based on continuous variation method.

(a)

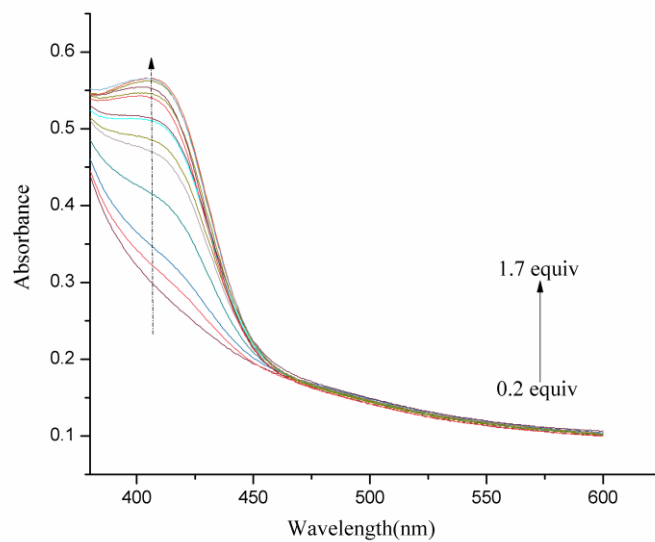

(b)

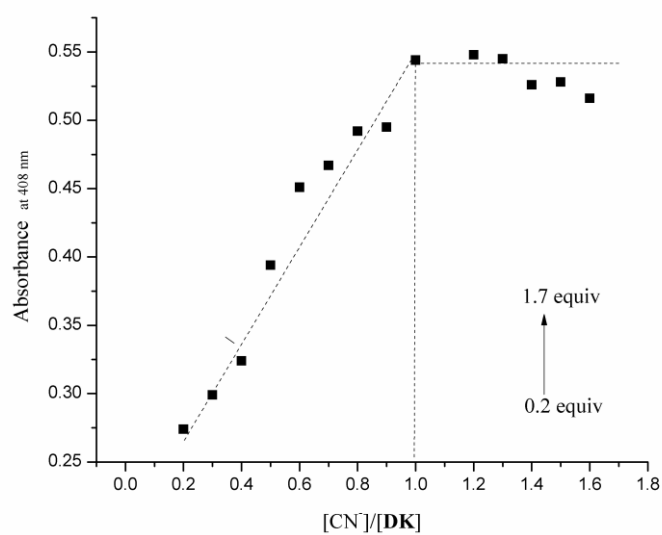

**Figure S8** Job's Plot showing the 1:1 stoichiometry between **DK** and CN<sup>-</sup>. (a) Absorption spectra of **DK** (1.0 × 10<sup>-5</sup> M) in the presence of different concentration of CN<sup>-</sup> (0.2-1.7 equiv.) in HEPES buffer /CH<sub>3</sub>CN (0.01 M, pH=7.3, V/V = 10:90) solution. (b) A plot of absorption intensity depending on the concentration of CN<sup>-</sup> in the range from 0.2-1.7 equiv.

(a)

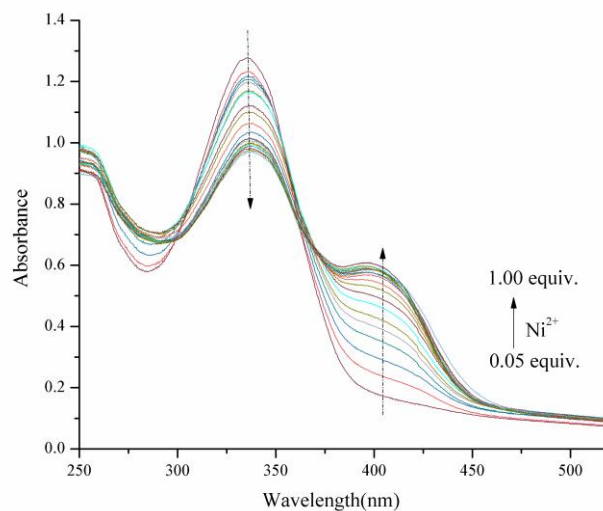

(b)

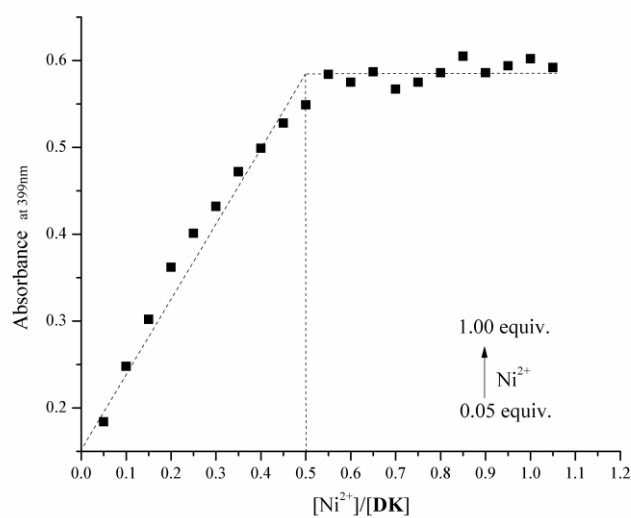

**Figure S9** Job's Plot showing the 2:1 stoichiometry between **DK** and Ni<sup>2+</sup>. (a) Absorption spectra of **DK** (1.0 × 10<sup>-5</sup> M) in the presence of different concentration of Ni<sup>2+</sup> (0.05-1.0 equiv.) in HEPES buffer /CH<sub>3</sub>CN (0.01 M, pH=7.3, V/V = 10:90) solution. (b) A plot of absorption intensity depending on the concentration of Ni<sup>2+</sup> in the range from 0.05-1.0 equiv.



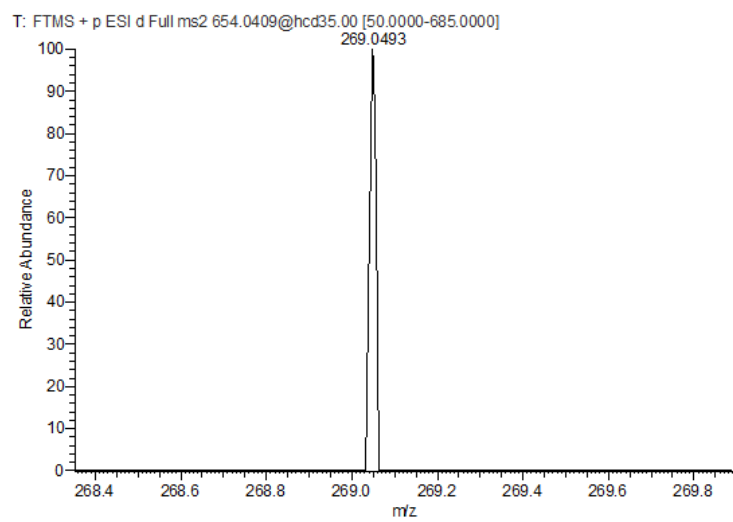

**Figure S10** ESI-MS data of  $[\text{DK-CN} + \text{H}^+]^+$ .

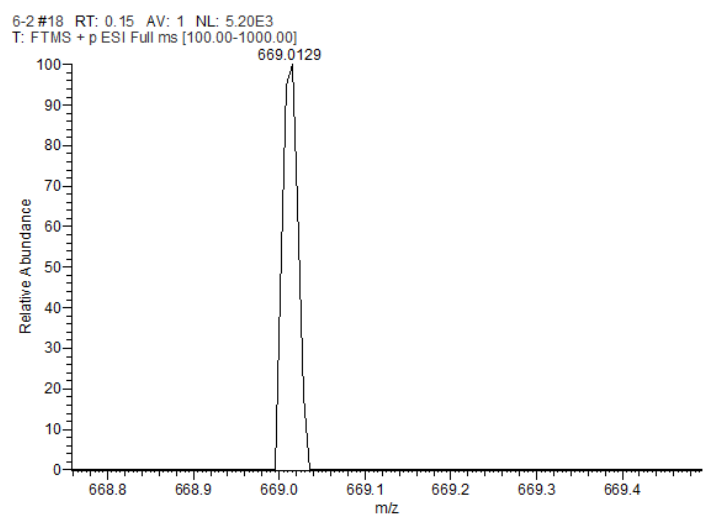

**Figure S11** ESI-MS data of  $[\text{DK} + 2\text{Ni}^{2+} + 2\text{NO}_3^- + \text{H}^+]^+$ .

(a)

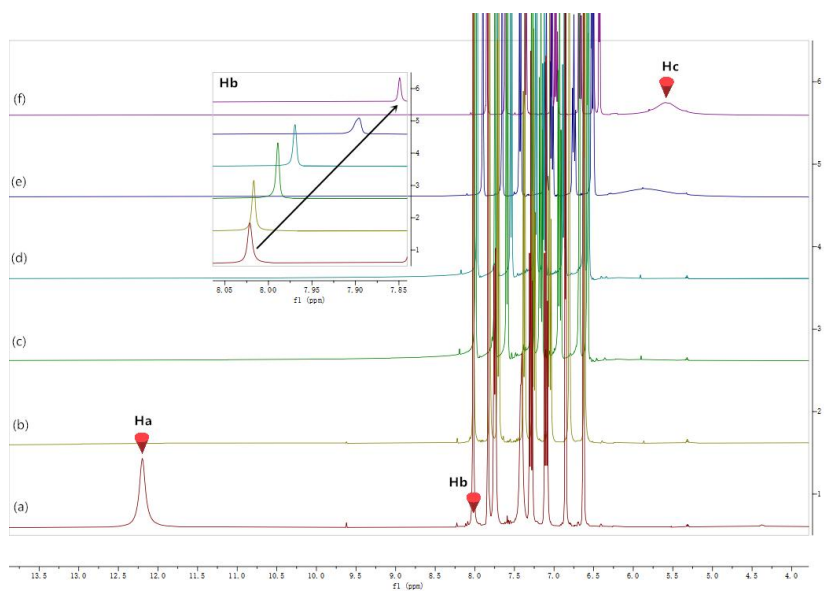

(b)

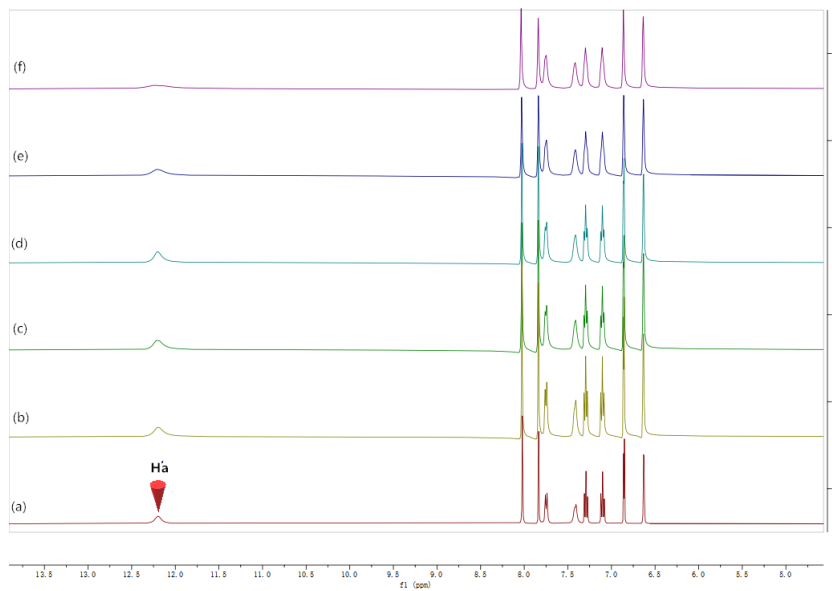

**Figure 12** <sup>1</sup>H NMR titration spectra (DMSO-d<sub>6</sub>, 400 MHz): (a) **DK** upon addition of CN<sup>-</sup> (a-f: 0-1.5equiv.); (b) **DK** upon addition of Ni<sup>2+</sup> (a-f: 0-0.75 equiv.).

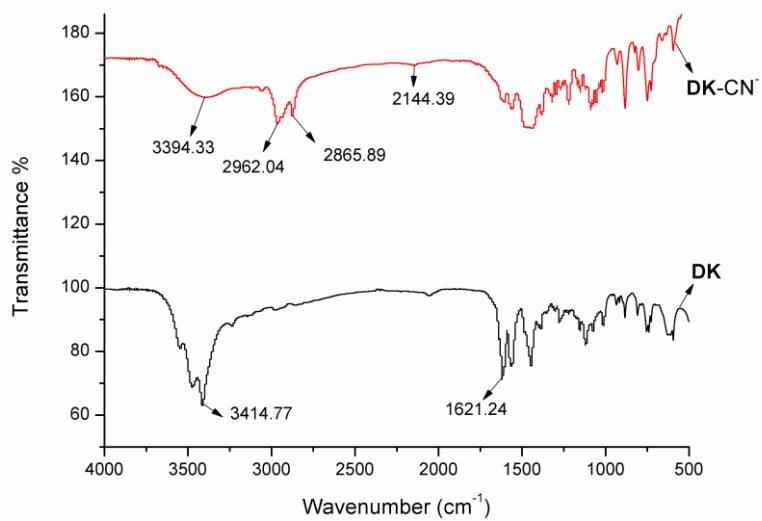

**Figure S13** FT-IR spectra of **DK** and **DK + CN<sup>-</sup>** in KBr disks.

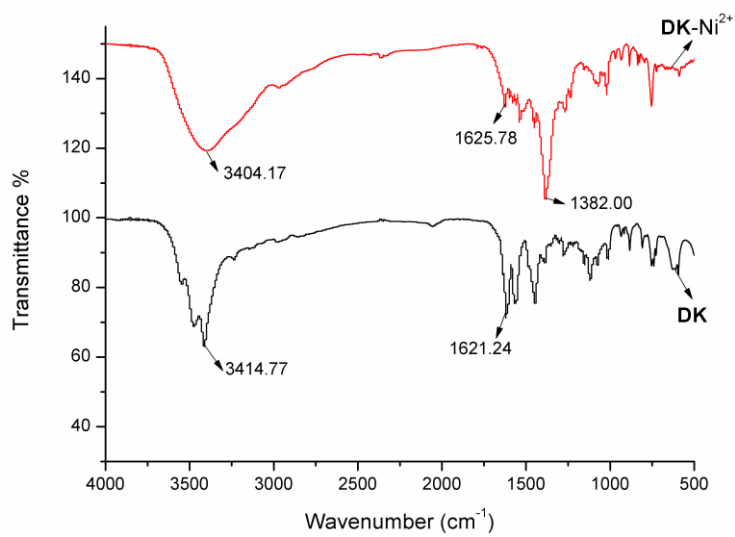

**Figure S14** FT-IR spectra of **DK** and **DK + Ni<sup>2+</sup>** in KBr disks.

**The calculation of the detection limits (LOD):**

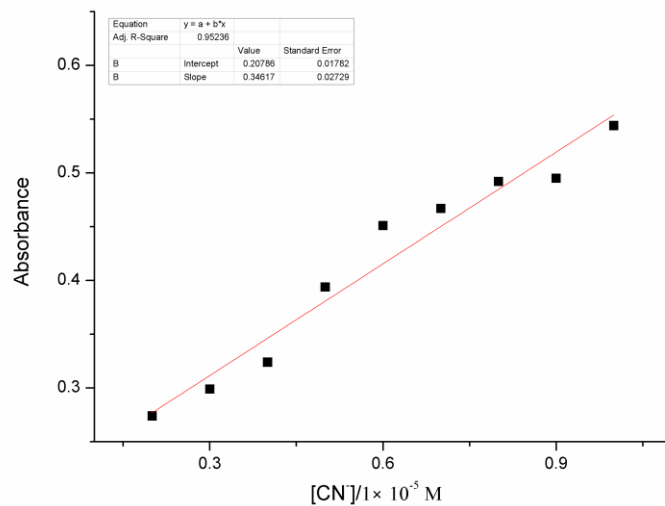

**Figure S15** Detection limit of **DK** towards the detection of  $\text{CN}^-$ .

The linear equation was “ $y = 0.34617x + 0.20786$ ”.

According to the common equation “ $\text{DL} = 3\delta/k$ ” that the value of signal-to-noise ratio (S/N) was regulated at “3”.

“ $\delta$ ” was the standard deviation of blank measurements (25 times detection).  $\sigma = 0.02$

“ $k$ ” represented the slope between absorbance versus the concentration of  $\text{CN}^-$ .  $k = 0.34617 \times 10^7$

**LOD** =  $K \times \delta / S = 17 \times 10^{-9}$  M.

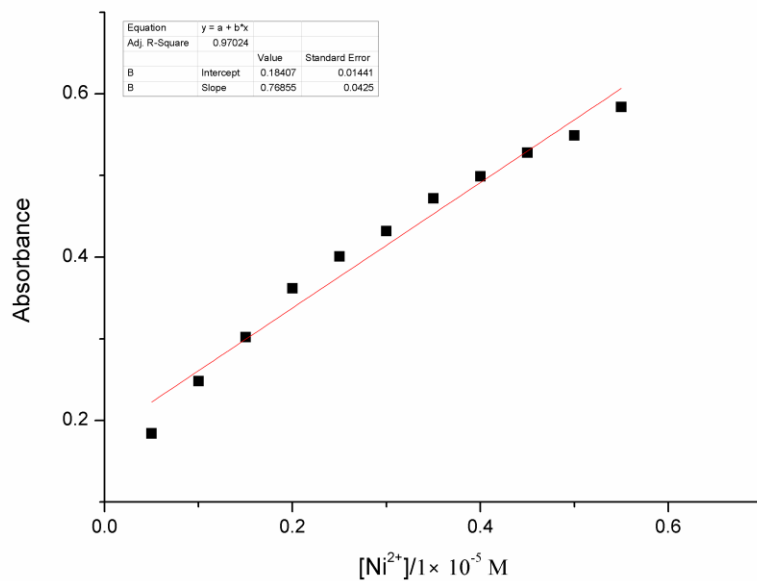

**Figure S16** Detection limit of **DK** towards the detection of  $\text{Ni}^{2+}$ .

The linear equation was “ $y = 0.76855x + 0.18407$ ”.

According to the common equation “ $\text{DL} = 3\delta/k$ ” that the value of signal-to-noise ratio (S/N) was regulated at “3”.

“ $\delta$ ” was the standard deviation of blank measurements (25 times detection).  $\sigma = 0.019$

“ $k$ ” represented the slope between absorbance versus the concentration of  $\text{Ni}^{2+}$ .  $k = 0.76855 \times 10^7$

**LOD** =  $K \times \delta / S = 7.4 \times 10^{-9}$  M.

**Table S1** Comparison with the reported chemosensors with **DK**. The maximum allowable level of drinking water stipulated by the World Health Organization (WHO) were 1.9  $\mu\text{M}$  for  $\text{CN}^-$  and 0.34  $\mu\text{M}$  for  $\text{Ni}^{2+}$  <sup>1,2</sup>.

| Chemosensor                                                                         | Detected ion     | Detection limit         | Detection medium                                                                 | Refs.               |
|-------------------------------------------------------------------------------------|------------------|-------------------------|----------------------------------------------------------------------------------|---------------------|
| 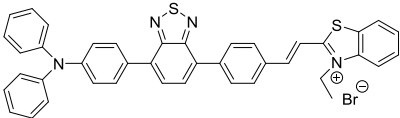   | $\text{CN}^-$    | $1.34 \times 10^{-7}$ M | THF/ $\text{H}_2\text{O}$ (2:8, v/v)                                             | 3                   |
|    | $\text{CN}^-$    | $4.8 \times 10^{-7}$ M  | DMSO/ $\text{H}_2\text{O}$ (9:1, v/v)                                            | 4                   |
|   | $\text{CN}^-$    | $1.8 \times 10^{-7}$ M  | DMSO/ $\text{H}_2\text{O}$ solution (6:4, v/v, containing 0.01 M HEPES, pH 7.26) | 5                   |
|  | $\text{CN}^-$    | $4.6 \times 10^{-7}$ M  | DMSO/ $\text{H}_2\text{O}$ (9:1, v/v)                                            | 6                   |
|  | $\text{CN}^-$    | $17 \times 10^{-9}$ M   | HEPES buffer / $\text{CH}_3\text{CN}$ (0.01 M, pH=7.3, V/V = 1:9)                | <i>Present work</i> |
|  | $\text{Ni}^{2+}$ | $1.1 \times 10^{-6}$ M  | MeOH/ $\text{H}_2\text{O}$ 1 : 1, HEPES buffer, pH = 7.0                         | 7                   |
|  | $\text{Ni}^{2+}$ | $2.61 \times 10^{-8}$ M | Ethanol                                                                          | 8                   |
|  | $\text{Ni}^{2+}$ | $1.91 \times 10^{-6}$ M | THF/ $\text{H}_2\text{O}$ (1.5:8.5, v/v)                                         | 9                   |

|                                                                                   |                  |                           |                                                              |                     |
|-----------------------------------------------------------------------------------|------------------|---------------------------|--------------------------------------------------------------|---------------------|
| 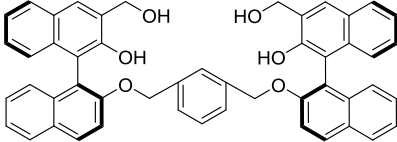 | Ni <sup>2+</sup> | 4.91 × 10 <sup>-6</sup> M | MeOH/H <sub>2</sub> O (1:1 (v/v), HEPES (50 mM), pH at 7.4   | 10                  |
|  | Ni <sup>2+</sup> | 7.4 × 10 <sup>-9</sup> M  | HEPES buffer /CH <sub>3</sub> CN (0.01 M, pH=7.3, V/V = 1:9) | <b>Present work</b> |

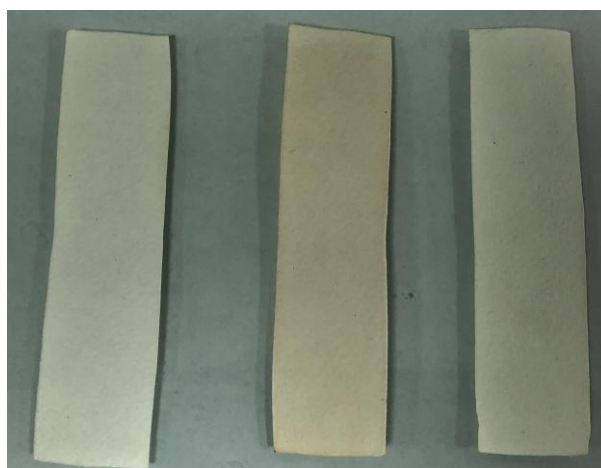

**Figure S17.** Test papers immersed in tap water contaminated with different contaminants, from left to right: the distilled water, the solutions of CN<sup>-</sup> in tap water and the tap water.

## References

- [1] Amhed, F.; Chorus, I.; Cotruvo, J.; Cunliffe, D.; Endo, T.; Fawell, J. K.; Howard, G.; Jackson, P.; Kumar, S.; Kunikane, S.; Magara, Y.; Ohanian, E.; Ong, C. N.; Schmoll, O. Guidelines for Drinking-Water Quality, 3rd ed., World Health Organization, Geneva, Switzerland, 2004.
- [2] Zhu, Y.; Wang, Z.; Yang, J.; Xu, X.; Wang, S.; Cai, Z.; Xu, H. J. N, N-Bis (2-pyridylmethyl) amine-based truxene derivative as a highly sensitive fluorescence sensor for Cu<sup>2+</sup> and Ni<sup>2+</sup> ion. *Chinese J. Org. Chem.*, 2019, **39**, 427-433.

- [3] Zhai, B.; Hu, Z.; Peng, C.; Liu, B.; Li, W.; Gao, C. Rational design of a colorimetric and fluorescence turn-on chemosensor with benzothiazolium moiety for cyanide detection in aqueous solution. *Spectrochim. Acta. A.* **2019**, 224, 1117409-117415.
- [4] Tavallali, H.; Deilamy-Rad, G.; Parhami, A.; Kiyani, S. Dithizone as novel and efficient chromogenic probe for cyanide detection in aqueous media through nucleophilic addition into diazenylthione moiety. *Spectrochim. Acta. A.* **2014**, 121, 139-146.
- [5] Li, J.; Qi, X.; Wei, W.; Liu, Y.; Xu, X.; Lin, Q.; Dong, W. A “donor-two-acceptor” sensor for cyanide detection in aqueous solution. *Sensors Actuators B Chem.* **2015**, 220, 986-991.
- [6] Niu, Q.; Lan, L.; Li, T.; Guo, Z.; Jiang, T.; Zhao, Z.; Feng, Z.; Xi, J. A highly selective turn-on fluorescent and naked-eye colorimetric sensor for cyanide detection in food samples and its application in imaging of living cells. *Sens. Actuators B: Chem.* **2018**, 276, 13-22.
- [7] Rani, R.; Paul, K.; Luxami, V. An NBD-based two-in-one  $\text{Cu}^{2+}/\text{Ni}^{2+}$  chemosensor with differential charge transfer processes. *New J. Chem.* **2016**, 40, 2418-2422.
- [8] Yang, G.; Meng, X.; Fang, S.; Wang, L.; Wang, Z.; Wang, F.; Duan, H.; Hao, A. Two novel pyrazole-based chemosensors: “naked-eye” colorimetric recognition of  $\text{Ni}^{2+}$  and  $\text{Al}^{3+}$  in alcohol and aqueous DMF media. *New J. Chem.* **2018**, 42, 14630-14641.
- [9] Pannipara, M.; Al-Sehemi, A. G.; Irfan, A.; Assiri, M.; Kalam, A.; Al-Ammari, Y. S. AIE active multianalyte fluorescent probe for the detection of  $\text{Cu}^{2+}$ ,  $\text{Ni}^{2+}$  and  $\text{Hg}^{2+}$  ions. *Spectrochim. Acta. A.* **2018**, 201, 54-60.
- [10] Velmurugan, K.; Prabhu, J.; Raman, A.; Duraipandy, N.; Kiran, M. S.; Easwaramoorthi, S.; Tang, L.; Nandhakumar, R. Dual Functional Fluorescent Chemosensor for Discriminative Detection of  $\text{Ni}^{2+}$  and  $\text{Al}^{3+}$  Ions and Its Imaging in Living Cells. *ACS Sustain. Chem. Eng.* **2018**, 6, 16532-16543.
